# Supplementary material for: Retinal microvascular and neuronal pathologies probed in vivo by adaptive optical two-photon fluorescence microscopy
Source: eLife. 2023 Apr 11;12:e84853. doi: 10.7554/eLife.84853 (PMC10089658; doi:10.7554/eLife.84853)
Supplement: Supplementary file 1. [file elife-84853-supp1.xlsx]

## Sheet: Sheet1
Parameters	Figure 1								Figure 2				Figure 3
Panel	B				C				A-B, F				A-B		E-F
Modality	In vivo 2PFM								In vivo 2PFM
Mouse line	Thy1-GFP Line-M								Wildtype				Thy1-YFP Line-16
Procedure	Retro-orbital injection (r.o.) of Evans Blue for AO measurement								R.o. injection of FITC-dextran				/
Illum. power (mW)	45								5.8				12		12
FOV(µm x µm)	72 x 72				132 x 97				580 x 580				580 x 580		193 x 193
Pixel size (µm)	0.36				0.97				2.9				1.45		0.97
Stack thickness (µm)	25				32				128 (A-B); 110 (F)				80		INL/GCL: 4/9/7.8 o.w. single section
Axial step (µm)	0.65				0.65				1.63 (A-B); 3.26 (F)				1.63		0.98
Parameters	Figure 4				Figure 5
Panel	C				A		B		C						D
					left	right	left	right	Full image			Inset
Modality	In vivo 2PFM				In vivo 2PFM				In vivo 2PFM
Mouse line	Thy1-YFP Line-16				VLDLR-KO/Sca1-GFP		Wildtype/Sca1-GFP		VLDLR-KO/Sca1-GFP
Procedure	/				/				R.o. injection of FITC
Illum. power (mW)	18				5.8		23		15						10
FOV(µm x µm)	580 x 580				580 x 580	97 x 174	520 x 520	124 x 193	580 x 580			58 x 58			580 x 580
Pixel size (µm)	1.45				2.9	0.97	2.9	0.76	2.9			0.97			2.9
Stack thickness (µm)	94				94	72	120	78	/			8.2			163
Axial step (µm)	3.26				3.26				/			1.63			1.63
Parameters	Figure 5												Figure 6
Panel	E				F				G				C		D
					Full image		Zoom-in		Top		Middle	Bottom
Modality	In vivo 2PFM								In vivo 2PFM				Ex vivo 2PFM		In vivo 2PFM
Mouse line	VLDLR-KO/Sca1-GFP								VLDLR-KO/Sca1-GFP				rd1		rd1
Procedure	R.o. injection of FITC				R.o. injection of Evans Blue				/				/		R.o. injection of Evans Blue
Illum. power (mW)	15				15-25				20		27		5		25
FOV(µm x µm)	580 x 580				580 x 580		63.5 x 127		58 x 58		102 x 127	56 x 56	512 x 512		290 x 290
Pixel size (µm)	2.9				2.9		0.72		0.29		0.97		2		1.45
Stack thickness (µm)	150				166 (NIR)		/		/		/		/		/
Axial step (µm)	1.63				1.63				/		/		/		/
Parameters	Figure 1-figure supplement 1				Figure 1-figure supplement 2				Figure 5-figure supplement 1
Panel	B				A		B		A		C		B		D
Modality	In vivo 2PFM								Ex vivo 2PFM
Mouse line	Wildtype				Wildtype		Thy1-YFP Line-16		VLDLR-KO/Sca1-GFP				Wildtype/Sca1-GFP
Procedure	R.o. injection of FITC-dextran				R.o. injection of FITC-dextran		/		/
Illum. power (mW)	12				12		18		12		12		18		18
FOV(µm x µm)	550 x 550				580 x 580		580 x 580		1380 x 1380		78 x 78		1380 x 1380		78 x 78
Pixel size (µm)	2.9				2.9		2.9		0.675		0.675		0.675		0.675
Stack thickness (µm)	127				/		/		82		82		71		71
Axial step (µm)	3.26				/		/		0.5		0.5		0.5		0.5
Parameters	Figure 5-figure supplement 2
Panel	A-C				D-E
Modality	In vivo 2PFM
Mouse line	Wildtype/Sca1-GFP
Procedure	R.o. injection of Evans Blue
Illum. power (mW)	20				20
FOV(µm x µm)	580 x 580				580 x 290
Pixel size (µm)	2.9				2.9
Stack thickness (µm)	130				130
Axial step (µm)	3.26				3.26
